# Supplementary material for: Computational design of C-substituted paraquat/diquat derivatives for neutral aqueous organic redox flow batteries
Source: Royal Society of Chemistry journal article supplement (doi:10.1039/d4nj01001a), 2024-01-01
Supplement: d4nj01001a1.pdf [file d4nj01001a1.pdf]

## Supporting Information

Computational design of C-substituted paraquat/diquat derivatives for neutral aqueous organic redox flow batteries

Wei Jin <sup>a</sup>, Yanli Chen <sup>\*a</sup>, Lai-Ke Chen <sup>b</sup>, De-Yin Wu <sup>b</sup>, Juan Xu <sup>a</sup> and Jianyu Cao <sup>\*a</sup>

<sup>a</sup> *Jiangsu Key Laboratory of Advanced Catalytic Materials and Technology, School of Petrochemical Engineering, Changzhou University, Changzhou, Jiangsu 213164, China.*

<sup>b</sup> *State Key Laboratory of Physical Chemistry of Solid Surface, and Department of Chemistry, College of Chemistry and Chemical Engineering, Xiamen University, Xiamen, 361005, China*

\*Corresponding author. E-mail: jycao@cczu.edu.cn (J. Cao); chenyl@cczu.edu.cn (Y. Chen)

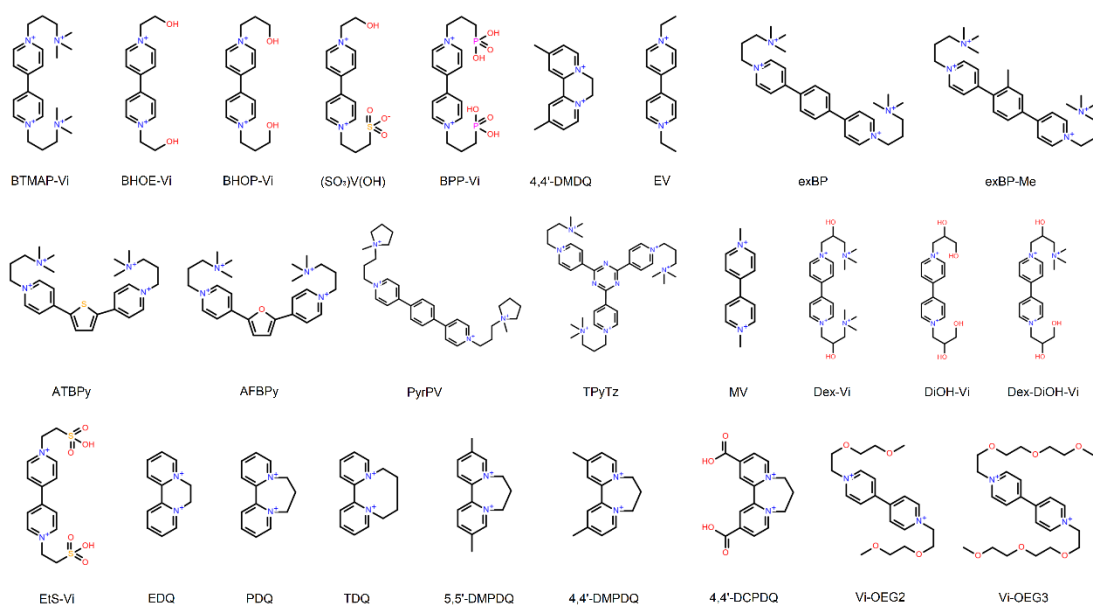

**Fig. S1** Viologen (Vi) and diquat (DQ) derivatives for estimating the standard reduction potential. Bis(3-trimethylammonio)propyl viologen tetrachloride (BTMAP-Vi) [S1], 1,1'-di(2-ethanol)-4,4'-bipyridinium dichloride (BHOE-Vi) [S2], 1,1'-di(2-propanol)-4,4'-bipyridinium dichloride (BHOP-Vi) [S2], 3-(1'-(2-hydroxyethyl)-[4,4'-bipyridin]-1,1'-diium-1-yl)propane-1-sulfonate bromide ((SO<sub>3</sub>)V(OH)) [S3], 1,1'-bis(3-phosphonopropyl)-(4,4'-bipyridine)-1,1'-diium (BPP-Vi) [S4], 4,4'-dimethyldiquat dichloride (4,4'-DMDQ) [S5], ethyl viologen dichloride (EV) [S6], exBP [S7], exBP-Me [S7], 1,1'-bis[3-(trimethylammonio)propyl]-4,4'-(2,5-thiophenediyl)bispyridinium tetrachloride (ATBPy) [S8], 1,1'-bis[3-(trimethylammonio)propyl]-4,4'-(2,5-furandiyl)bispyridinium tetrachloride (AFBPy) [S8], PyrPV [S9], 2,4,6-tris[1-(trimethylammonio)-propyl-4-pyridiniumyl]-1,3,5-triazine hexachloride (TPyTz) [S10], methyl viologen (MV) [S11], bis(3-trimethylammonio-2-hydroxy)propyl viologen tetrachloride (Dex-Vi) [S12], DiOH-Vi [S13], Dex-DiOH-Vi [S13], EtS-Vi [S13], EDQ [S14], PDQ [S14], TDQ [S14], 5,5'-DMPDQ [S14], 4,4'-DMPDQ [S14], 4,4'-DCPDQ [S14], 1,1'-bis(2-(2-methoxyethoxy)ethyl)-[4,4'-bipyridine]-1,1'-diium bromide (Vi-OEG2) [S15], 1,1'-bis(2-(2-(2-methoxyethoxy)ethoxy)ethyl)-[4,4'-bipyridine]-1,1'-diium bromide(Vi-OEG3) [S15].

**Table S1** Experimental redox potential ( $E_{\text{exp}}^0$ ) for 26 previously reported water-soluble viologen derivatives and their theoretical LUMO energies calculated using different functionals.

| No. | Molecule                | $E_{\text{exp}}^0$ (V) | LUMO (eV) |        |
|-----|-------------------------|------------------------|-----------|--------|
|     |                         |                        | B3LYP     | M06-2X |
| 1   | BTMAP-Vi                | -0.350                 | -3.672    | -2.902 |
| 2   | BHOE-Vi                 | -0.396                 | -3.658    | -2.723 |
| 3   | BHOP-Vi                 | -0.433                 | -3.576    | -2.469 |
| 4   | (SO <sub>3</sub> )V(OH) | -0.400                 | -3.742    | -2.787 |
| 5   | BPP-Vi                  | -0.460                 | -3.681    | -2.832 |
| 6   | 4,4'-DMDQ               | -0.400                 | -3.580    | -2.577 |
| 7   | EV                      | -0.380                 | -3.580    | -2.724 |
| 8   | exBP                    | -0.750                 | -3.326    | -2.579 |
| 9   | exBP-Me                 | -0.910                 | -3.178    | -2.241 |
| 10  | ATBPy                   | -0.560                 | -3.650    | -2.716 |
| 11  | AFBPy                   | -0.600                 | -3.491    | -2.759 |
| 12  | PyrPV                   | -0.760                 | -3.232    | -2.298 |
| 13  | TPyTz                   | -0.250                 | -3.958    | -2.991 |
| 14  | MV                      | -0.450                 | -3.541    | -2.763 |
| 15  | Dex-Vi                  | -0.322                 | -3.827    | -2.789 |
| 16  | DiOH-Vi                 | -0.366                 | -3.685    | -2.772 |
| 17  | Dex-DiOH-Vi             | -0.342                 | -3.779    | -2.944 |
| 18  | EtS-Vi                  | -0.341                 | -3.665    | -2.789 |
| 19  | EDQ                     | -0.050                 | -4.106    | -2.794 |
| 20  | PDQ                     | -0.270                 | -3.962    | -2.698 |
| 21  | TDQ                     | -0.400                 | -3.626    | -2.324 |
| 22  | 5,5'-DMPDQ              | -0.410                 | -3.746    | -2.456 |
| 23  | 4,4'-DMPDQ              | -0.380                 | -3.746    | -2.345 |
| 24  | 4,4'-DCPDQ              | 0.270                  | -4.484    | -3.127 |
| 25  | Vi-OEG2                 | -0.320                 | -3.833    | -2.661 |
| 26  | VI-OEG3                 | -0.330                 | -3.938    | -2.943 |

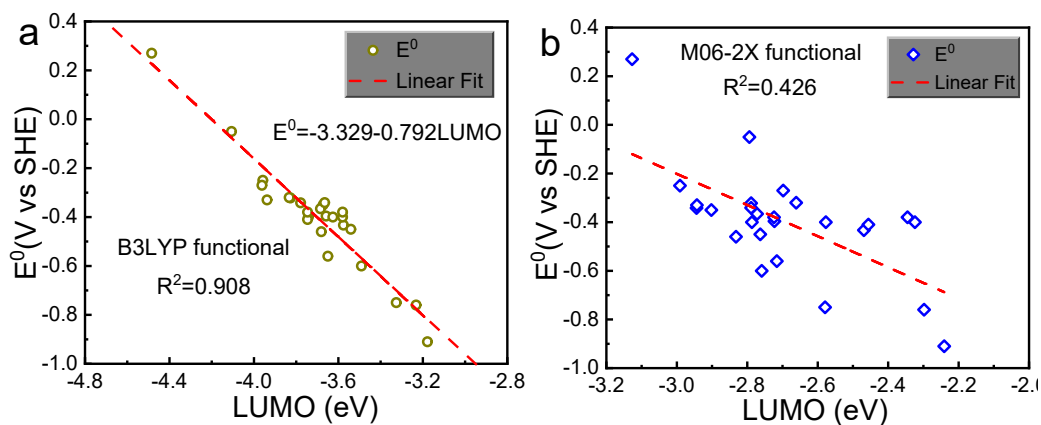

**Fig. S2** The experimental redox potential ( $E_{\text{exp}}^0$ ) versus the LUMO energy. (a) The LUMO energy calculated using the B3LYP functional. (b) The LUMO energy calculated using the M06-2X functional.

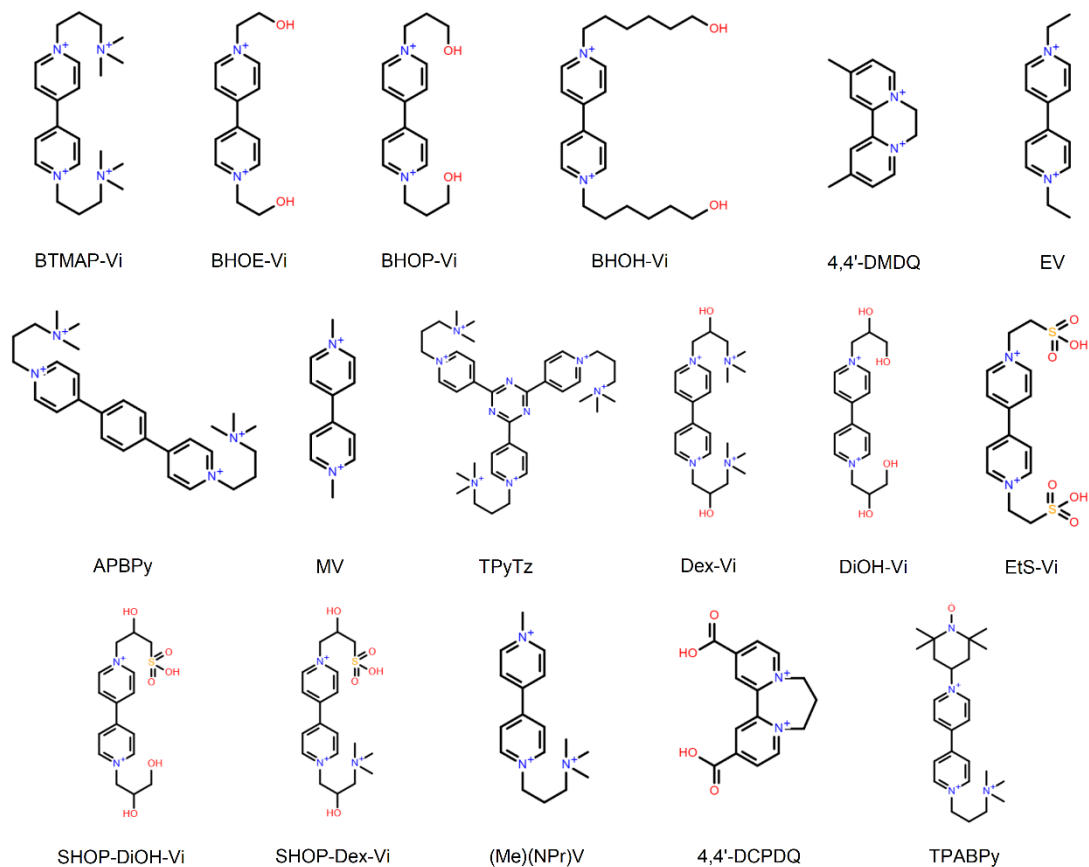

**Fig. S3** Viologen (Vi) and diquat (DQ) derivatives for estimating the kinetic rate constant. (BHOH-Vi) [S2], (APBPy) [S16], (SHOP-DiOH-Vi) [S13], (SHOP-Dex-Vi) [S13], (Me)(NPr)V [S17], TPABPy [S18].

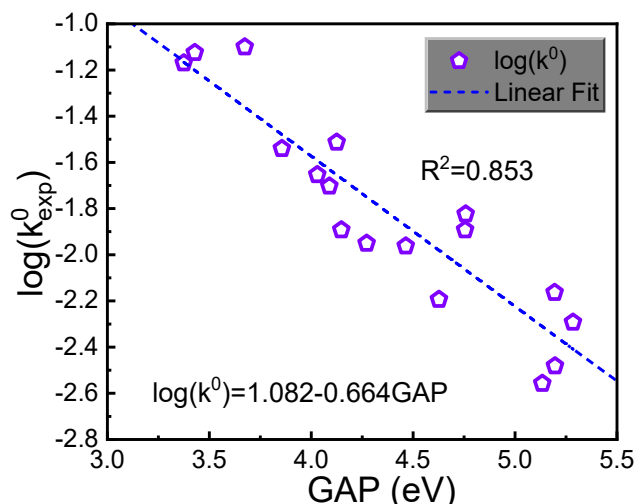

**Fig. S4** The correlation plot between  $\log(k^0_{\text{exp}})$  and the B3LYP-calculated LUMO-HOMO GAP for 17 water-soluble viologen derivatives.

**Table S2** The calculated  $E^0$  and  $k^0$  values of the 74 promising analyte compounds for neutral AORFBs. Me, Et and Pr represent one, two and three methylene units within the substituent group, respectively. N represents terminal trimethyl quaternary ammonium group, P phosphonic acid group, S sulfonate and C carboxylic acid group, respectively.

| No. | Parent structure | Substitution site | Substituent group | Number of substituents | $k^0 \times 10^{-3}$ (cm s <sup>-1</sup> ) | $E^0$ (V) |
|-----|------------------|-------------------|-------------------|------------------------|--------------------------------------------|-----------|
| 1   | PQT              | 2                 | MeP               | 1                      | 6.358                                      | -0.44972  |
| 2   | PQT              | 2                 | EtP               | 1                      | 9.220                                      | -0.52591  |
| 3   | PQT              | 2                 | PrP               | 1                      | 9.083                                      | -0.42807  |
| 4   | PQT              | 3                 | MeP               | 1                      | 4.423                                      | -0.42887  |
| 5   | PQT              | 3                 | PrP               | 1                      | 5.024                                      | -0.51629  |
| 5   | DQT              | 5                 | PrP               | 1                      | 4.470                                      | -0.67749  |
| 6   | PQT              | 2,2'              | EtP               | 2                      | 6.610                                      | -0.41523  |
| 7   | PQT              | 2,2'              | PrP               | 2                      | 7.103                                      | -0.41443  |
| 8   | PQT              | 3,3'              | MeP               | 2                      | 5.154                                      | -0.43689  |
| 9   | PQT              | 3,3'              | EtP               | 2                      | 5.123                                      | -0.52511  |
| 10  | PQT              | 3,3'              | PrP               | 2                      | 5.017                                      | -0.54516  |
| 11  | DQT              | 6,6'              | EtP?              | 2                      | 8.129                                      | -0.49864  |
| 12  | DQT              | 5,5'              | PrP               | 2                      | 6.444                                      | -0.62857  |
| 13  | PQT              | 2,2',6,6'         | EtP               | 4                      | 5.952                                      | -0.40882  |
| 14  | PQT              | 2,2',6,6'         | PrP               | 4                      | 7.157                                      | -0.34546  |
| 15  | PQT              | 3,3',5'           | PrP               | 3                      | 6.170                                      | -0.35669  |
| 16  | PQT              | 2,3',5'           | MeP               | 3                      | 5.724                                      | -0.4401   |
| 17  | PQT              | 2,3',5'           | PrP               | 3                      | 5.002                                      | -0.49784  |

|    |     |           |     |   |        |          |
|----|-----|-----------|-----|---|--------|----------|
| 18 | PQT | 2,3',5',6 | MeP | 4 | 4.319  | -0.53393 |
| 19 | PQT | 2,3',5',6 | PrP | 4 | 4.538  | -0.71999 |
| 20 | PQT | 2,2',6    | PrS | 3 | 8.227  | -0.33022 |
| 21 | PQT | 2         | MeC | 1 | 10.679 | -0.53553 |
| 22 | PQT | 2         | EtC | 1 | 11.528 | -0.55639 |
| 23 | PQT | 2         | PrC | 1 | 12.332 | -0.55799 |
| 24 | PQT | 3         | MeC | 1 | 7.178  | -0.44731 |
| 25 | PQT | 3         | EtC | 1 | 8.081  | -0.46255 |
| 26 | PQT | 3         | PrC | 1 | 8.908  | -0.49864 |
| 27 | DQT | 6         | MeC | 1 | 5.367  | -0.62616 |
| 28 | DQT | 6         | EtC | 1 | 6.956  | -0.66065 |
| 29 | DQT | 6         | PrC | 1 | 8.491  | -0.6005  |
| 30 | DQT | 5         | MeC | 1 | 4.972  | -0.6807  |
| 31 | DQT | 5         | EtC | 1 | 6.822  | -0.65664 |
| 32 | DQT | 5         | PrC | 1 | 7.645  | -0.65744 |
| 33 | DQT | 4         | MeC | 1 | 5.547  | -0.59649 |
| 34 | DQT | 4         | EtC | 1 | 6.822  | -0.65664 |
| 35 | DQT | 4         | PrC | 1 | 7.645  | -0.65744 |
| 36 | PQT | 2,3',5',6 | MeC | 4 | 6.863  | -0.43769 |
| 37 | PQT | 2,3',5',6 | EtC | 4 | 6.977  | -0.75849 |
| 38 | PQT | 2,3',5',6 | PrC | 4 | 4.811  | -0.8419  |
| 39 | PQT | 3,3',5,5' | MeC | 4 | 6.966  | -0.67187 |
| 40 | PQT | 3,3',5,5' | EtC | 4 | 4.443  | -0.8836  |
| 41 | PQT | 3,3',5,5' | PrC | 4 | 5.407  | -0.85393 |
| 42 | PQT | 2,2'      | MeC | 2 | 10.679 | -0.52832 |
| 43 | PQT | 2,2'      | EtC | 2 | 10.955 | -0.44651 |
| 44 | PQT | 2,2'      | PrC | 2 | 14.807 | -0.46335 |
| 45 | PQT | 3,3'      | MeC | 2 | 5.699  | -0.58045 |
| 46 | PQT | 3,3'      | EtC | 2 | 6.873  | -0.64781 |
| 47 | PQT | 3,3'      | PrC | 2 | 4.338  | -0.9213  |
| 48 | DQT | 6,6'      | MeC | 2 | 4.920  | -0.53714 |
| 49 | DQT | 6,6'      | EtC | 2 | 5.514  | -0.69754 |
| 50 | DQT | 6,6'      | PrC | 2 | 7.497  | -0.6414  |
| 51 | DQT | 5,5'      | MeC | 2 | 6.329  | -0.61814 |
| 52 | DQT | 5,5'      | EtC | 2 | 7.877  | -0.60932 |
| 53 | DQT | 5,5'      | PrC | 2 | 7.520  | -0.67669 |
| 54 | DQT | 3         | MeC | 1 | 4.358  | -0.59729 |
| 55 | DQT | 3         | EtC | 1 | 6.198  | -0.64781 |
| 56 | DQT | 3         | PrC | 1 | 7.588  | -0.643   |
| 57 | DQT | 4,4'      | MeC | 2 | 5.367  | -0.62616 |
| 58 | DQT | 4,4'      | EtC | 2 | 6.956  | -0.66065 |
| 59 | DQT | 4,4'      | PrC | 2 | 8.491  | -0.60050 |
| 60 | PQT | 3,3',5'   | MeC | 3 | 4.987  | -0.55238 |

|    |     |           |     |   |        |          |
|----|-----|-----------|-----|---|--------|----------|
| 61 | PQT | 3,3',5'   | EtC | 3 | 4.876  | -0.81463 |
| 62 | PQT | 3,3',5'   | PrC | 3 | 5.759  | -0.83227 |
| 63 | PQT | 2,3',6    | MeC | 3 | 7.509  | -0.38315 |
| 64 | PQT | 2,3',6    | EtC | 3 | 8.554  | -0.53072 |
| 65 | PQT | 2,3',6    | PrC | 3 | 8.961  | -0.49223 |
| 66 | PQT | 2,2',6    | PrC | 3 | 11.288 | -0.4016  |
| 67 | PQT | 2,2',6,6' | EtC | 4 | 9.529  | -0.46416 |
| 68 | PQT | 2,2',6,6' | PrC | 4 | 10.179 | -0.50746 |
| 69 | DQT | 3,3'      | MeC | 2 | 4.504  | -0.6013  |
| 70 | DQT | 3,3'      | EtC | 2 | 5.062  | -0.71518 |
| 71 | DQT | 3,3'      | PrC | 2 | 6.791  | -0.7232  |
| 72 | PQT | 2,3',5'   | MeC | 3 | 5.688  | -0.59911 |
| 73 | PQT | 2,3',5'   | EtC | 3 | 7.579  | -0.60029 |
| 74 | PQT | 2,3',5'   | PrC | 3 | 7.963  | -0.60111 |

## References

- [S1] E. S. Beh, D. D. Porcellinis, R. L. Gracia, K. T. Xia, R. G. Gordon, M. J. Aziz, *ACS Energy Lett.*, 2017, 2, 639-644.
- [S2] Y. Liu, Y. Li, P. Zuo, Q. Chen, G. Tang, P. Sun, Z. Yang, T. Xu, *ChemSusChem*, 2020, 13, 2245-2249.
- [S3] H. Wang, D. Li, J. Xu, Y. Wu, Y. Cui, L. Chen, *J. Power Sources*, 2021, 492, 229659.
- [S4] S. Jin, E. M. Fell, L. Vina-Lopez, Y. Jing, P. W. Michalak, R. G. Gordon, M. J. Aziz, *Adv. Energy Mater.*, 2020, 10, 2000100.
- [S5] J. Huang, Z. Yang, V. Murugesan, E. Walter, A. Hollas, B. Pan, R. S. Assary, I. A. Shkrob, X. Wei, Z. Zhang, *ACS Energy Lett.*, 2018, 3, 2533-2538.
- [S6] L. Liu, Y. Yao, Z. Wang, Y.-C. Lu, *Nano Energy*, 2021, 84, 105897.
- [S7] G. Tang, Y. Liu, Y. Li, K. Peng, P. Zuo, Z. Yang, T. Xu, *JACS Au*, 2022, 2, 1214-1222.
- [S8] M. Huang, S. Hu, X. Yuan, J. Huang, W. Li, Z. Xiang, Z. Fu, Z. Liang, *Adv. Funct. Mater.*, 2022, 32, 2111744.
- [S9] M. Pan, L. Gao, J. Liang, P. Zhang, S. Lu, Y. Lu, J. Ma, Z. Jin, *Adv. Energy Mater.*, 2022, 12, 2103478.
- [S10] J. Huang, S. Hu, X. Yuan, Z. Xiang, M. Huang, K. Wan, J. Piao, Z. Fu, Z. Liang, *Angew. Chem. Int. Ed.*, 2021, 60, 2-7.
- [S11] T. Liu, X. Wei, Z. Nie, V. Sprenkle, W. Wang, *Adv. Energy Mater.*, 2016, 6, 1501449.
- [S12] X.-L. Lv, P. Sullivan, H.-C. Fu, X. X. Hu, H. Liu, S. Jin, W. Li, D. Feng, *ACS Energy Lett.*, 2022, 7, 2428-2434.
- [S13] P. T. Sullivan, H. Liu, X.-L. Lv, S. Jin, W. Li, D. Feng, *Adv. Energy Mater.*, 2023, 13, 2203919.
- [S14] J. Asenjo-Pascual, I. Salmeron-Sanchez, P. Mauleón, M. Agirre, A. C. Lopes, O. Zugazua, E. Sánchez-Díez, J. R. Avilés-Moreno, P. Ocon, *J. Power Sources*, 2023, 564, 232817.

- [S15] Y. Yao, W. Ma, J. Lei, Z. Wang, Y.-C. Lu, L. Liu, *J. Mater. Chem. A*, 2023, 11, 12984-12991.
- [S16] S. Hu, T. Li, M. Huang, J. Huang, W. Li, L. Wang, Z. Chen, Z. Fu, X. Li, Z. Liang, *Adv. Mater.*, 2021, 33, 2005839.
- [S17] C. DeBruler, B. Hu, J. Moss, X. Liu, J. Luo, Y. Sun, T. L. Liu, *Chem*, 2017, 3, 1-18.
- [18] L. Wang, M. Huang, K. Wan, Z. Fu, Z. Xiang, Z. Liang, *Adv. Funct. Mater.*, 2023, 2310620.
